# Supplementary material for: Flux and surfactant directed facile thermal conversion synthesis of hierarchical porous MgO for efficient adsorption and catalytic growth of carbon nanotubes
Source: Royal Society of Chemistry journal article supplement (doi:10.1039/c3ce41394b), 2013-10-01
Supplement: c3ce41394b.pdf [file c3ce41394b.pdf]

Electronic Supplementary Information for:

## Flux and Surfactant Directed Facile Thermal Conversion Synthesis of Hierarchical Porous MgO for Efficient Adsorption and Catalytic Growth of Carbon Nanotubes

Wancheng Zhu<sup>a,\*</sup>, Linlin Zhang<sup>a</sup>, Gui-Li Tian<sup>b</sup>, Ruguo Wang<sup>a</sup>, Heng Zhang<sup>a</sup>, Xianglan Piao<sup>b</sup>,

Qiang Zhang<sup>b,‡</sup>

a. Department of Chemical Engineering, Qufu Normal University, Shandong 273165, China

b. Department of Chemical Engineering, Tsinghua University, Beijing 100084, China

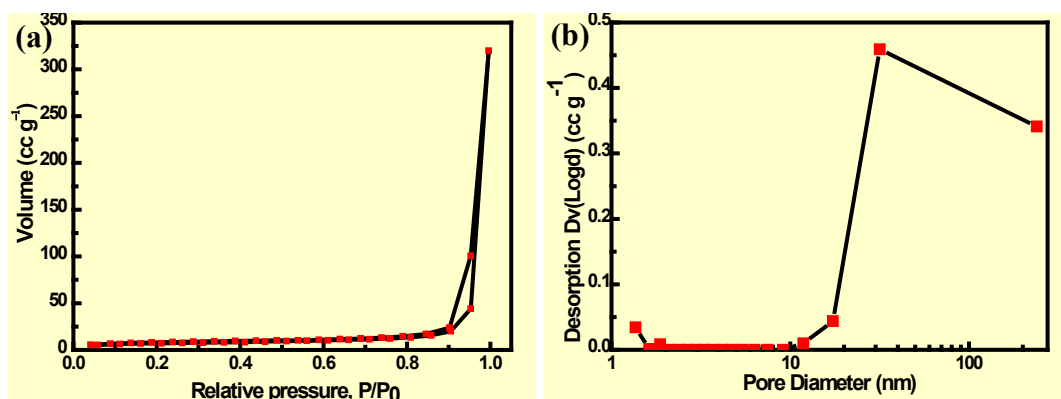

**Figure S1.** (a) N<sub>2</sub> adsorption-desorption isotherms and (b) pore size distribution of the hierarchical porous MgO superstructures calcined by the precursor at 650 °C (heating rate: 10 °C min<sup>-1</sup>) for 2.0 h, in the presence of NaCl and NP-9.

\*

Corresponding authors. Tel.: +86-537-4453130.

Email: [zhuwancheng@tsinghua.org.cn](mailto:zhuwancheng@tsinghua.org.cn) (W.C. Zhu); [zhang-qiang@mails.tsinghua.edu.cn](mailto:zhang-qiang@mails.tsinghua.edu.cn) (Q. Zhang).

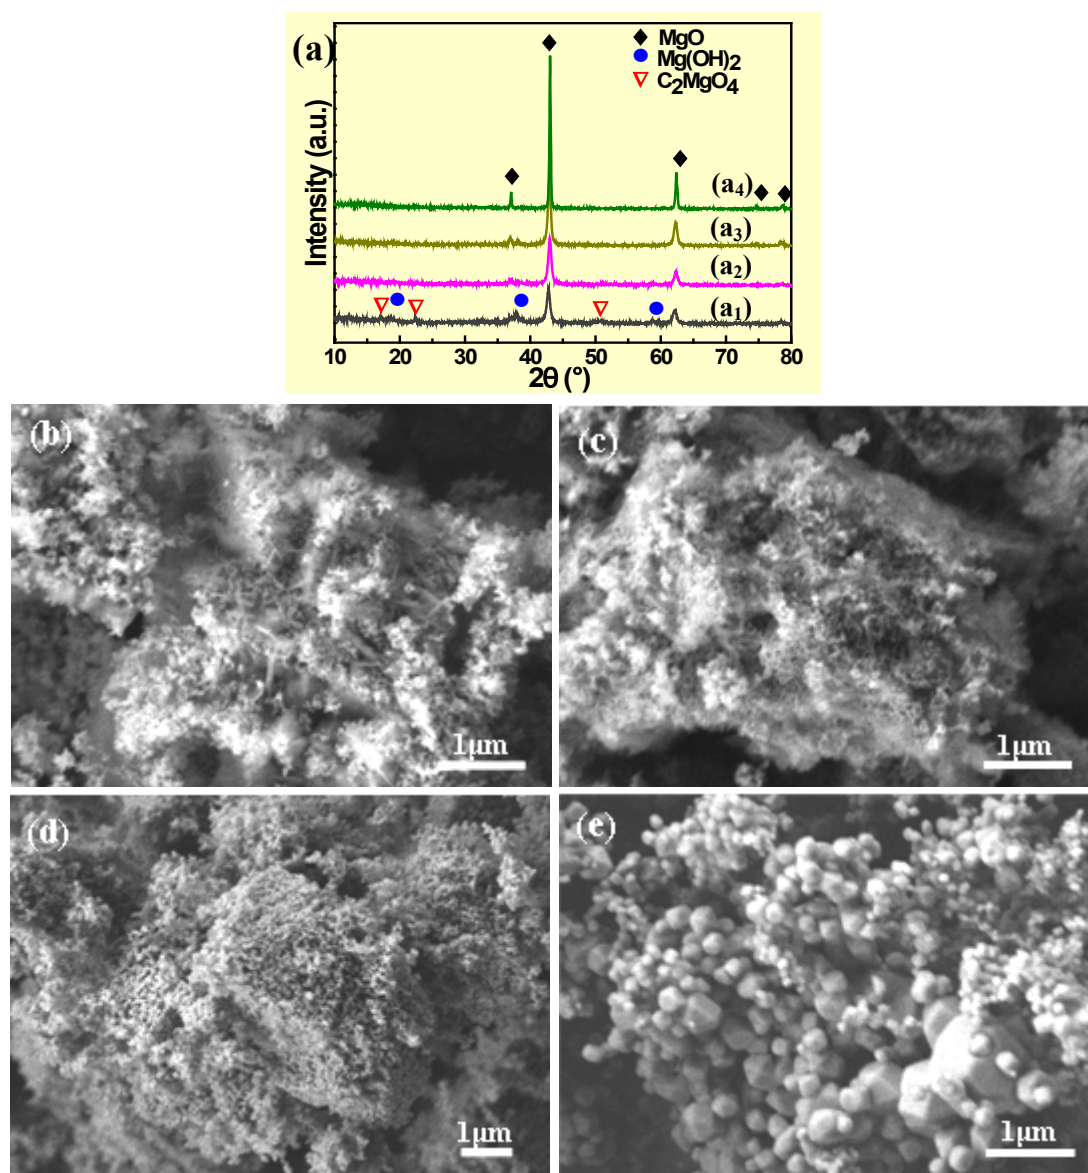

**Figure S2.** Compositions and morphology of the products calcined by the precursor  $\text{MgC}_2\text{O}_4 \cdot 2\text{H}_2\text{O}$  at different temperatures for 2.0 h (heating rate:  $2\text{ }^\circ\text{C min}^{-1}$ ) in the presence of NaCl and NP-9.

Temperature ( $^\circ\text{C}$ ): (a<sub>1</sub>, b)-400; (a<sub>2</sub>, c)-500, (a<sub>3</sub>, d)-650, (a<sub>4</sub>, e)-800.

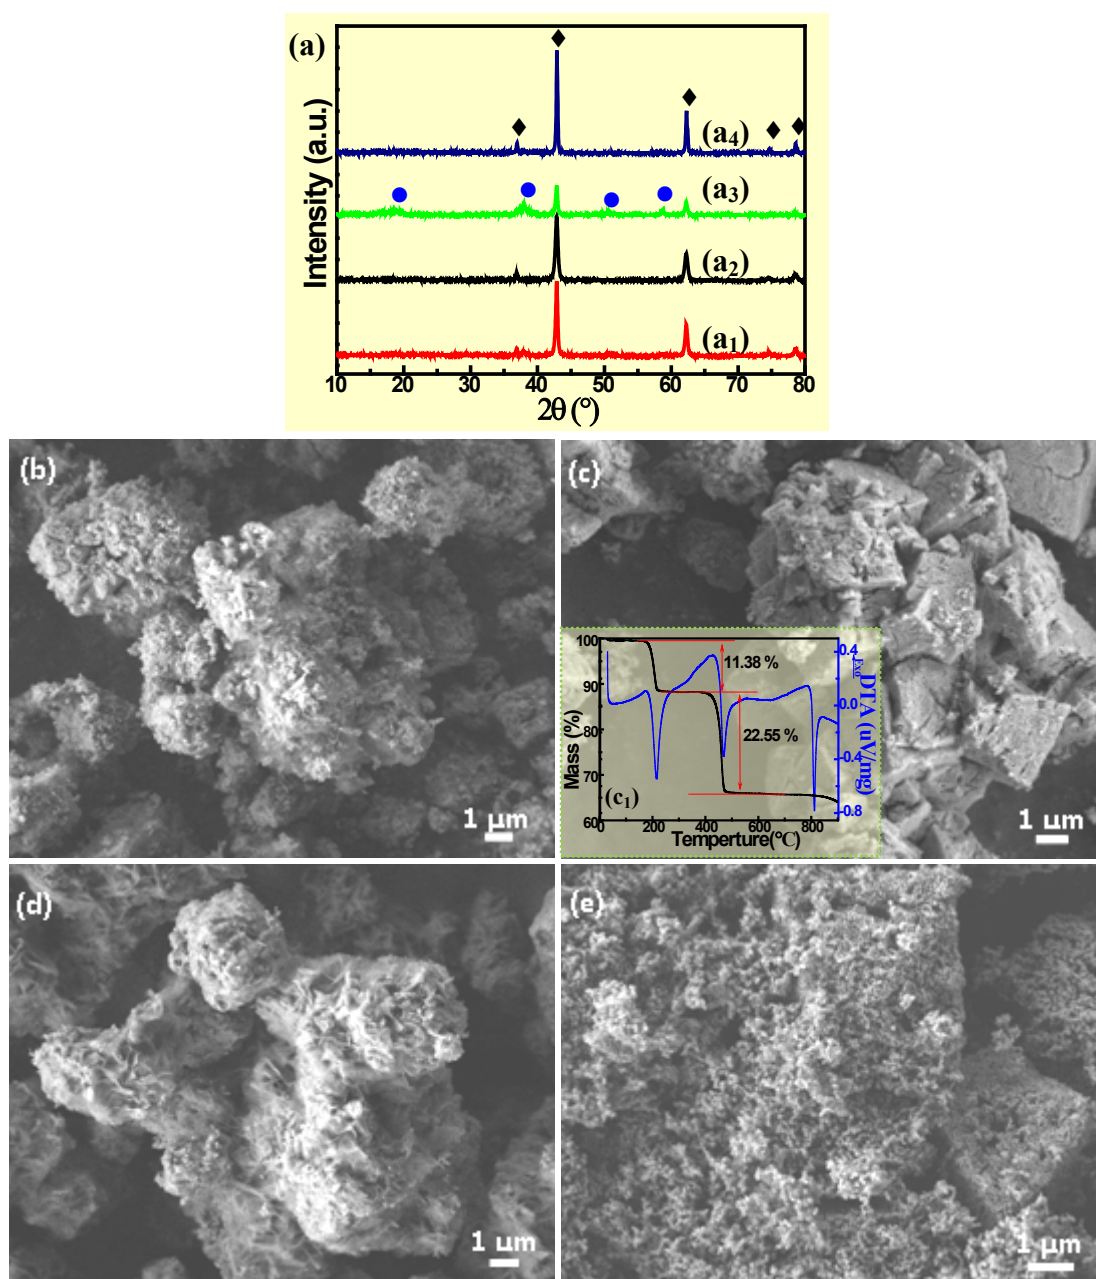

**Figure S3.** (a) XRD patterns and (b-e) SEM images of the products calcined in the presence of various additives at 650 °C (a<sub>1</sub>-a<sub>3</sub>,b-d) or 800 °C (a<sub>4</sub>,e) for 2.0 h.

Additives: a<sub>1</sub>,a<sub>4</sub>,b,e-none; a<sub>2</sub>,c-NaCl; a<sub>3</sub>,d-NP-9. Heating rate: 10 °C min<sup>-1</sup>. Inset c<sub>1</sub>: TG-DTA curves of MgC<sub>2</sub>O<sub>4</sub>·2H<sub>2</sub>O when calcined with NaCl (Molar ratio of NaCl/MgC<sub>2</sub>O<sub>4</sub>·2H<sub>2</sub>O =3:1). ●: Mg(OH)<sub>2</sub> (JCPDS No. 07-0239); ◆: MgO (JCPDS No. 45-0946).
